# Supplementary material for: Inequality in Health Services for Internal Migrants in China: A National Cross-Sectional Study on the Role of Fund Location of Social Health Insurance
Source: PubMed Central journal article supplement (PMC7504160; doi:10.3390/ijerph17176327), 2020-08-31
Supplement: ijerph-17-06327-s001.pdf [file ijerph-17-06327-s001.pdf]

|                                 |                                                         |       |       |        |        |        |      |      |        |        |      |      |      |        |        |      |
|---------------------------------|---------------------------------------------------------|-------|-------|--------|--------|--------|------|------|--------|--------|------|------|------|--------|--------|------|
|                                 | Lower (percentile20–39.9)                               | 1.13  | 0.05  | 0.01   | 1.03   | 1.24   | 1.02 | 0.07 | 0.79   | 0.89   | 1.17 | 1.11 | 0.05 | 0.01   | 1.02   | 1.20 |
|                                 | Middle (percentile40–59.9)                              | 1.12  | 0.05  | 0.01   | 1.03   | 1.23   | 1.02 | 0.10 | 0.81   | 0.84   | 1.24 | 1.10 | 0.05 | 0.03   | 1.01   | 1.20 |
|                                 | Higher (percentile60–79.9)                              | 1.01  | 0.05  | 0.77   | 0.93   | 1.11   | 1.01 | 0.10 | 0.90   | 0.83   | 1.23 | 1.02 | 0.04 | 0.69   | 0.93   | 1.11 |
|                                 | Highest (≥percentile80)                                 | 1.11  | 0.07  | 0.10   | 0.98   | 1.24   | 0.93 | 0.10 | 0.50   | 0.75   | 1.15 | 1.05 | 0.06 | 0.36   | 0.94   | 1.17 |
| BMIUR/RNCMS (reference)         |                                                         |       |       |        |        |        |      |      |        |        |      |      |      |        |        |      |
| Type of social health insurance | BMIUE                                                   | 1.60  | 0.23  | <0.001 | 1.21   | 2.11   | 1.17 | 0.19 | 0.34   | 0.85   | 1.60 | 1.36 | 0.16 | 0.01   | 1.09   | 1.71 |
|                                 | Others                                                  | 17.29 | 25.35 | 0.05   | 0.98   | 305.98 | 1.03 | 0.41 | 0.93   | 0.47   | 2.25 | 1.31 | 0.61 | 0.57   | 0.52   | 3.28 |
| Good (reference)                |                                                         |       |       |        |        |        |      |      |        |        |      |      |      |        |        |      |
| Self-rating of health           | General                                                 | 0.75  | 0.04  | <0.001 | 0.67   | 0.84   | 0.66 | 0.04 | <0.001 | 0.59   | 0.75 | 0.73 | 0.03 | <0.001 | 0.67   | 0.80 |
|                                 | Poor                                                    | 0.83  | 0.08  | 0.05   | 0.69   | 1.00   | 0.74 | 0.13 | 0.08   | 0.53   | 1.03 | 0.80 | 0.06 | 0.01   | 0.69   | 0.94 |
| No (reference)                  |                                                         |       |       |        |        |        |      |      |        |        |      |      |      |        |        |      |
| Two-week morbidity              | Yes                                                     | 1.01  | 0.09  | 0.95   | 0.85   | 1.20   | 1.10 | 0.14 | 0.42   | 0.87   | 1.41 | 1.04 | 0.08 | 0.64   | 0.89   | 1.21 |
| No (reference)                  |                                                         |       |       |        |        |        |      |      |        |        |      |      |      |        |        |      |
| Chronic morbidity               | Yes                                                     | 1.24  | 0.07  | <0.001 | 1.11   | 1.38   | 1.43 | 0.17 | <0.001 | 1.13   | 1.80 | 1.30 | 0.06 | <0.001 | 1.18   | 1.43 |
| Radom effects (Level 2)         |                                                         |       |       |        |        |        |      |      |        |        |      |      |      |        |        |      |
|                                 | Variance (enrolment with local social health insurance) | 0.58  | 0.08  |        | 0.44   | 0.75   | 0.71 | 0.15 |        | 0.46   | 1.08 | 0.59 | 0.12 |        | 0.40   | 0.88 |
|                                 | Variance (intercept)                                    | 2.74  | 0.18  |        | 2.42   | 3.11   | 1.92 | 0.17 |        | 1.62   | 2.27 | 2.55 | 0.19 |        | 2.21   | 2.94 |
| ICC                             |                                                         |       |       |        |        |        |      |      |        |        |      |      |      |        |        |      |
|                                 | Empty model                                             | 0.45  | 0.02  |        | 0.42   | 0.48   | 0.36 | 0.02 |        | 0.32   | 0.40 | 0.45 | 0.01 |        | 0.42   | 0.48 |
|                                 | Full model                                              | 0.45  | 0.02  |        | 0.42   | 0.49   | 0.37 | 0.02 |        | 0.33   | 0.41 | 0.44 | 0.02 |        | 0.40   | 0.47 |
| Wald Chi Square test            |                                                         |       |       |        |        |        |      |      |        |        |      |      |      |        |        |      |
|                                 | Chi-Square                                              |       |       |        | 386.9  |        |      |      |        | 192.12 |      |      |      |        | 432.31 |      |
|                                 | p value                                                 |       |       |        | <0.001 |        |      |      |        | <0.001 |      |      |      |        | <0.001 |      |

\* Average marginal effects (AME) of location of social health insurance funds for BMIUR/RNCMS: 7.7% (5.8%, 9.5%) for rural-to-urban respondents; 8.5% (4.1%, 13.0%) for urban-to-urban respondents; 7.6% (6.0%, 9.2%) for all respondents.



|                                 |                                                         |       |       |        |      |        |      |      |        |      |      |      |      |        |      |      |
|---------------------------------|---------------------------------------------------------|-------|-------|--------|------|--------|------|------|--------|------|------|------|------|--------|------|------|
|                                 | Lower (percentile20–39.9)                               | 1.13  | 0.05  | 0.01   | 1.03 | 1.24   | 1.02 | 0.07 | 0.79   | 0.89 | 1.17 | 1.11 | 0.05 | 0.01   | 1.02 | 1.20 |
|                                 | Middle (percentile40–59.9)                              | 1.12  | 0.05  | 0.01   | 1.03 | 1.23   | 1.02 | 0.10 | 0.81   | 0.84 | 1.24 | 1.10 | 0.05 | 0.03   | 1.01 | 1.20 |
|                                 | Higher (percentile60–79.9)                              | 1.01  | 0.05  | 0.77   | 0.93 | 1.11   | 1.01 | 0.10 | 0.90   | 0.83 | 1.23 | 1.02 | 0.04 | 0.69   | 0.93 | 1.11 |
|                                 | Highest (≥percentile80)                                 | 1.11  | 0.07  | 0.10   | 0.98 | 1.24   | 0.93 | 0.10 | 0.50   | 0.75 | 1.15 | 1.05 | 0.06 | 0.36   | 0.94 | 1.17 |
| BMIUR/RNCMS (reference)         |                                                         |       |       |        |      |        |      |      |        |      |      |      |      |        |      |      |
| Type of social health insurance | BMIUE                                                   | 0.63  | 0.09  | <0.001 | 0.47 | 0.82   | 0.86 | 0.14 | 0.34   | 0.62 | 1.18 | 0.73 | 0.08 | 0.01   | 0.59 | 0.92 |
|                                 | Others                                                  | 10.82 | 15.92 | 0.11   | 0.60 | 193.76 | 0.89 | 0.37 | 0.77   | 0.39 | 2.00 | 0.96 | 0.46 | 0.93   | 0.38 | 2.43 |
| Good (reference)                |                                                         |       |       |        |      |        |      |      |        |      |      |      |      |        |      |      |
| Self-rating of health           | General                                                 | 0.75  | 0.04  | <0.001 | 0.67 | 0.84   | 0.66 | 0.04 | <0.001 | 0.59 | 0.75 | 0.73 | 0.03 | <0.001 | 0.67 | 0.80 |
|                                 | Poor                                                    | 0.83  | 0.08  | 0.05   | 0.69 | 1.00   | 0.74 | 0.13 | 0.08   | 0.53 | 1.03 | 0.80 | 0.06 | 0.01   | 0.69 | 0.94 |
| No (reference)                  |                                                         |       |       |        |      |        |      |      |        |      |      |      |      |        |      |      |
| Two-week morbidity              | Yes                                                     | 1.01  | 0.09  | 0.95   | 0.85 | 1.20   | 1.10 | 0.14 | 0.42   | 0.87 | 1.41 | 1.04 | 0.08 | 0.64   | 0.89 | 1.21 |
| No (reference)                  |                                                         |       |       |        |      |        |      |      |        |      |      |      |      |        |      |      |
| Chronic morbidity               | Yes                                                     | 1.24  | 0.07  | <0.001 | 1.11 | 1.38   | 1.43 | 0.17 | <0.01  | 1.13 | 1.80 | 1.30 | 0.06 | <0.001 | 1.18 | 1.43 |
| Radom effects (Level 2)         |                                                         |       |       |        |      |        |      |      |        |      |      |      |      |        |      |      |
|                                 | Variance (enrolment with local social health insurance) | 0.58  | 0.08  |        | 0.44 | 0.75   | 0.71 | 0.15 |        | 0.46 | 1.08 | 0.59 | 0.12 |        | 0.40 | 0.88 |
|                                 | Variance (intercept)                                    | 2.74  | 0.18  |        | 2.42 | 3.11   | 1.92 | 0.17 |        | 1.62 | 2.27 | 2.55 | 0.19 |        | 2.21 | 2.94 |
| ICC                             |                                                         |       |       |        |      |        |      |      |        |      |      |      |      |        |      |      |
|                                 | Empty model                                             | 0.45  | 0.02  |        | 0.42 | 0.48   | 0.36 | 0.02 |        | 0.32 | 0.40 | 0.45 | 0.01 |        | 0.42 | 0.48 |
|                                 | Full model                                              | 0.45  | 0.02  |        | 0.42 | 0.49   | 0.37 | 0.02 |        | 0.33 | 0.41 | 0.44 | 0.02 |        | 0.40 | 0.47 |
| Wald Chi Square test            |                                                         |       |       |        |      |        |      |      |        |      |      |      |      |        |      |      |
|                                 | Chi-Square                                              |       |       | 386.9  |      |        |      |      | 192.12 |      |      |      |      | 432.31 |      |      |
|                                 | p value                                                 |       |       | <0.001 |      |        |      |      | <0.001 |      |      |      |      | <0.001 |      |      |

\* Average marginal effects (AME) of location of social health insurance funds for BMIUE: 0.3% (-3.9%, 4.5%) for rural-to-urban respondents; 4.7% (-0.3%, 9.7%) for urban-to-urban respondents; 2.3% (-1.7%, 6.3%) for all respondents.

**Table S3** Interaction effect between location and type of social health insurance on visits to local physicians when needed: results of two-level logistic regression models

| Variables                                                     |                                    | Rural to Urban Respondents |       |         |       | Urban to Urban Respondents |      |         |       | All Respondents |       |         |       |      |      |       |
|---------------------------------------------------------------|------------------------------------|----------------------------|-------|---------|-------|----------------------------|------|---------|-------|-----------------|-------|---------|-------|------|------|-------|
|                                                               |                                    | AOR/ICC                    | SE    | P Value | 95%CI | AOR/ICC                    | SE   | P Value | 95%CI | AOR/ICC         | SE    | P Value | 95%CI |      |      |       |
| Fixed effects (Level 1)                                       |                                    |                            |       |         |       |                            |      |         |       |                 |       |         |       |      |      |       |
| Enrolment with a local social health insurance program        | No (reference)                     |                            |       |         |       |                            |      |         |       |                 |       |         |       |      |      |       |
|                                                               | Yes *                              | 1.16                       | 0.08  | 0.04    | 1.01  | 1.33                       | 1.00 | 0.12    | 0.98  | 0.79            | 1.28  | 1.11    | 0.07  | 0.10 | 0.98 | 1.25  |
| Without a local BMIUE/RNCMS                                   |                                    |                            |       |         |       |                            |      |         |       |                 |       |         |       |      |      |       |
| Interaction between location and type social health insurance | (reference)                        |                            |       |         |       |                            |      |         |       |                 |       |         |       |      |      |       |
|                                                               | Location × BMIUE                   | 1.54                       | 0.26  | 0.01    | 1.10  | 2.15                       | 1.15 | 0.21    | 0.45  | 0.80            | 1.65  | 1.17    | 0.14  | 0.18 | 0.93 | 1.48  |
|                                                               | Location × Others                  | 14.78                      | 21.58 | 0.07    | 0.84  | 258.72                     | 5.55 | 4.51    | 0.04  | 1.13            | 27.30 | 6.75    | 4.66  | 0.01 | 1.74 | 26.13 |
| Gender                                                        | Male (reference)                   |                            |       |         |       |                            |      |         |       |                 |       |         |       |      |      |       |
|                                                               | Female                             | 1.06                       | 0.04  | 0.10    | 0.99  | 1.13                       | 1.15 | 0.07    | 0.03  | 1.02            | 1.30  | 1.08    | 0.03  | 0.01 | 1.02 | 1.14  |
| Age (Years)                                                   | 15–24 (reference)                  |                            |       |         |       |                            |      |         |       |                 |       |         |       |      |      |       |
|                                                               | 25–34                              | 1.09                       | 0.08  | 0.22    | 0.95  | 1.25                       | 0.90 | 0.13    | 0.45  | 0.68            | 1.19  | 1.05    | 0.06  | 0.43 | 0.93 | 1.18  |
|                                                               | 35–44                              | 1.05                       | 0.08  | 0.46    | 0.91  | 1.22                       | 0.83 | 0.13    | 0.22  | 0.61            | 1.12  | 1.00    | 0.07  | 0.99 | 0.88 | 1.14  |
|                                                               | 45–54                              | 0.91                       | 0.07  | 0.24    | 0.79  | 1.06                       | 0.85 | 0.13    | 0.30  | 0.62            | 1.16  | 0.89    | 0.06  | 0.11 | 0.78 | 1.03  |
|                                                               | 55+                                | 1.02                       | 0.11  | 0.85    | 0.82  | 1.27                       | 0.88 | 0.17    | 0.50  | 0.60            | 1.28  | 0.99    | 0.09  | 0.93 | 0.84 | 1.18  |
| Marital status                                                | Never married/Single (reference)   |                            |       |         |       |                            |      |         |       |                 |       |         |       |      |      |       |
|                                                               | Married                            | 1.03                       | 0.08  | 0.70    | 0.89  | 1.19                       | 1.08 | 0.13    | 0.55  | 0.84            | 1.37  | 1.03    | 0.08  | 0.71 | 0.89 | 1.19  |
|                                                               | Divorced                           | 1.04                       | 0.15  | 0.79    | 0.79  | 1.37                       | 1.13 | 0.28    | 0.62  | 0.70            | 1.83  | 1.04    | 0.13  | 0.76 | 0.81 | 1.33  |
|                                                               | Widowed                            | 0.90                       | 0.19  | 0.60    | 0.60  | 1.35                       | 1.46 | 0.41    | 0.17  | 0.85            | 2.52  | 0.99    | 0.18  | 0.97 | 0.70 | 1.40  |
| Educational attainment                                        | Illiterate (reference)             |                            |       |         |       |                            |      |         |       |                 |       |         |       |      |      |       |
|                                                               | Primary school                     | 1.05                       | 0.10  | 0.61    | 0.87  | 1.27                       | 0.65 | 0.19    | 0.14  | 0.37            | 1.15  | 1.01    | 0.10  | 0.90 | 0.84 | 1.22  |
|                                                               | Junior middle school               | 1.14                       | 0.11  | 0.17    | 0.94  | 1.38                       | 0.67 | 0.20    | 0.18  | 0.37            | 1.20  | 1.10    | 0.10  | 0.28 | 0.93 | 1.31  |
|                                                               | Senior middle school               | 1.09                       | 0.15  | 0.51    | 0.84  | 1.43                       | 0.74 | 0.22    | 0.30  | 0.41            | 1.32  | 1.07    | 0.12  | 0.54 | 0.86 | 1.33  |
|                                                               | University/college                 | 1.12                       | 0.13  | 0.36    | 0.88  | 1.42                       | 0.75 | 0.23    | 0.36  | 0.41            | 1.38  | 1.09    | 0.10  | 0.39 | 0.90 | 1.31  |
| Employment                                                    | Unemployed (reference)             |                            |       |         |       |                            |      |         |       |                 |       |         |       |      |      |       |
|                                                               | Employed                           | 0.89                       | 0.04  | 0.01    | 0.80  | 0.98                       | 1.12 | 0.12    | 0.29  | 0.91            | 1.39  | 0.93    | 0.04  | 0.10 | 0.86 | 1.01  |
| Household income ranking                                      | Lowest (<percentile 20, reference) |                            |       |         |       |                            |      |         |       |                 |       |         |       |      |      |       |
|                                                               | Lower (percentile20–39.9)          | 1.01                       | 0.05  | 0.75    | 0.93  | 1.11                       | 1.14 | 0.13    | 0.25  | 0.91            | 1.42  | 1.03    | 0.05  | 0.49 | 0.95 | 1.12  |

|                                 |                                                         |      |      |        |      |       |      |      |        |      |      |      |      |        |      |      |
|---------------------------------|---------------------------------------------------------|------|------|--------|------|-------|------|------|--------|------|------|------|------|--------|------|------|
|                                 | Middle (percentile40–59.9)                              | 1.00 | 0.06 | 0.93   | 0.90 | 1.12  | 1.15 | 0.14 | 0.24   | 0.91 | 1.46 | 1.03 | 0.05 | 0.61   | 0.93 | 1.14 |
|                                 | Higher (percentile60–79.9)                              | 1.02 | 0.05 | 0.63   | 0.93 | 1.13  | 1.03 | 0.11 | 0.78   | 0.84 | 1.26 | 1.01 | 0.05 | 0.79   | 0.92 | 1.11 |
|                                 | Highest (≥percentile80)                                 | 1.07 | 0.08 | 0.41   | 0.92 | 1.24  | 0.96 | 0.12 | 0.76   | 0.76 | 1.22 | 1.02 | 0.07 | 0.82   | 0.88 | 1.17 |
| BMIUR/RNCMS (reference)         |                                                         |      |      |        |      |       |      |      |        |      |      |      |      |        |      |      |
| Type of social health insurance | BMIUE                                                   | 0.59 | 0.10 | <0.001 | 0.43 | 0.81  | 0.90 | 0.13 | 0.46   | 0.69 | 1.19 | 0.78 | 0.07 | 0.01   | 0.65 | 0.93 |
|                                 | Others                                                  | 2.34 | 2.22 | 0.37   | 0.36 | 15.02 | 0.78 | 0.22 | 0.38   | 0.45 | 1.35 | 0.82 | 0.19 | 0.40   | 0.52 | 1.30 |
| Good (reference)                |                                                         |      |      |        |      |       |      |      |        |      |      |      |      |        |      |      |
| Self-rating of health           | General                                                 | 1.15 | 0.06 | 0.01   | 1.04 | 1.27  | 1.16 | 0.11 | 0.10   | 0.97 | 1.39 | 1.14 | 0.05 | <0.001 | 1.05 | 1.25 |
|                                 | Poor                                                    | 1.81 | 0.18 | <0.001 | 1.49 | 2.20  | 1.88 | 0.46 | 0.01   | 1.17 | 3.03 | 1.80 | 0.18 | <0.001 | 1.47 | 2.20 |
| No (reference)                  |                                                         |      |      |        |      |       |      |      |        |      |      |      |      |        |      |      |
| Two-week morbidity              | Yes                                                     | 1.21 | 0.06 | <0.001 | 1.10 | 1.34  | 1.20 | 0.11 | 0.05   | 1.00 | 1.44 | 1.21 | 0.06 | <0.001 | 1.10 | 1.32 |
| No (reference)                  |                                                         |      |      |        |      |       |      |      |        |      |      |      |      |        |      |      |
| Chronic morbidity               | Yes                                                     | 1.30 | 0.10 | <0.001 | 1.12 | 1.51  | 1.40 | 0.18 | 0.01   | 1.08 | 1.81 | 1.33 | 0.09 | <0.001 | 1.17 | 1.53 |
| Radom effects (Level 2)         |                                                         |      |      |        |      |       |      |      |        |      |      |      |      |        |      |      |
|                                 | Variance (enrolment with local social health insurance) | 0.35 | 0.06 |        | 0.25 | 0.51  | 0.21 | 0.07 |        | 0.11 | 0.41 | 0.25 | 0.04 |        | 0.18 | 0.35 |
|                                 | Variance (intercept)                                    | 0.37 | 0.04 |        | 0.31 | 0.45  | 0.39 | 0.06 |        | 0.29 | 0.53 | 0.38 | 0.03 |        | 0.32 | 0.45 |
| ICC                             |                                                         |      |      |        |      |       |      |      |        |      |      |      |      |        |      |      |
|                                 | Empty model                                             | 0.10 | 0.01 |        | 0.09 | 0.12  | 0.10 | 0.01 |        | 0.08 | 0.13 | 0.10 | 0.01 |        | 0.09 | 0.12 |
|                                 | Full model                                              | 0.10 | 0.01 |        | 0.09 | 0.12  | 0.11 | 0.01 |        | 0.08 | 0.14 | 0.10 | 0.01 |        | 0.09 | 0.12 |
| Wald Chi Square test            |                                                         |      |      |        |      |       |      |      |        |      |      |      |      |        |      |      |
|                                 | Chi-Square                                              |      |      | 206.87 |      |       |      |      | 97.23  |      |      |      |      | 225.23 |      |      |
|                                 | p value                                                 |      |      | <0.001 |      |       |      |      | <0.001 |      |      |      |      | <0.001 |      |      |

\* Average marginal effects (AME) of location of social health insurance funds for BMIUR/RNCMS: 3.2% (0.1%, 6.3%) for rural-to-urban respondents; 0.1% (-5.3%, 4.9%) for urban-to-urban respondents; 2.2% (-0.5%, 4.9%) for all respondents.



|                                 |                                                         |      |      |        |      |       |      |      |        |      |      |      |      |        |      |      |
|---------------------------------|---------------------------------------------------------|------|------|--------|------|-------|------|------|--------|------|------|------|------|--------|------|------|
|                                 | Lower (percentile20–39.9)                               | 1.01 | 0.05 | 0.75   | 0.93 | 1.11  | 1.14 | 0.13 | 0.25   | 0.91 | 1.42 | 1.03 | 0.05 | 0.49   | 0.95 | 1.12 |
|                                 | Middle (percentile40–59.9)                              | 1.00 | 0.06 | 0.93   | 0.90 | 1.12  | 1.15 | 0.14 | 0.24   | 0.91 | 1.46 | 1.03 | 0.05 | 0.61   | 0.93 | 1.14 |
|                                 | Higher (percentile60–79.9)                              | 1.02 | 0.05 | 0.63   | 0.93 | 1.13  | 1.03 | 0.11 | 0.78   | 0.84 | 1.26 | 1.01 | 0.05 | 0.79   | 0.92 | 1.11 |
|                                 | Highest (≥percentile80)                                 | 1.07 | 0.08 | 0.41   | 0.92 | 1.24  | 0.96 | 0.12 | 0.76   | 0.76 | 1.22 | 1.02 | 0.07 | 0.82   | 0.88 | 1.17 |
| BMIUR/RNCMS (reference)         |                                                         |      |      |        |      |       |      |      |        |      |      |      |      |        |      |      |
| Type of social health insurance | BMIUE                                                   | 1.69 | 0.27 | <0.001 | 1.23 | 2.33  | 1.11 | 0.15 | 0.46   | 0.84 | 1.46 | 1.28 | 0.11 | 0.01   | 1.08 | 1.53 |
|                                 | Others                                                  | 3.96 | 3.82 | 0.15   | 0.60 | 26.22 | 0.87 | 0.21 | 0.56   | 0.53 | 1.40 | 1.05 | 0.24 | 0.83   | 0.67 | 1.64 |
| Good (reference)                |                                                         |      |      |        |      |       |      |      |        |      |      |      |      |        |      |      |
| Self-rating of health           | General                                                 | 1.15 | 0.06 | 0.01   | 1.04 | 1.27  | 1.16 | 0.11 | 0.10   | 0.97 | 1.39 | 1.14 | 0.05 | <0.001 | 1.05 | 1.25 |
|                                 | Poor                                                    | 1.81 | 0.18 | <0.001 | 1.49 | 2.20  | 1.88 | 0.46 | 0.01   | 1.17 | 3.03 | 1.80 | 0.18 | <0.001 | 1.47 | 2.20 |
| No (reference)                  |                                                         |      |      |        |      |       |      |      |        |      |      |      |      |        |      |      |
| Two-week morbidity              | Yes                                                     | 1.21 | 0.06 | <0.001 | 1.10 | 1.34  | 1.20 | 0.11 | 0.05   | 1.00 | 1.44 | 1.21 | 0.06 | <0.001 | 1.10 | 1.32 |
| No (reference)                  |                                                         |      |      |        |      |       |      |      |        |      |      |      |      |        |      |      |
| Chronic morbidity               | Yes                                                     | 1.30 | 0.10 | <0.001 | 1.12 | 1.51  | 1.40 | 0.18 | 0.01   | 1.08 | 1.81 | 1.33 | 0.09 | <0.001 | 1.17 | 1.53 |
| Radom effects (Level 2)         |                                                         |      |      |        |      |       |      |      |        |      |      |      |      |        |      |      |
|                                 | Variance (enrolment with local social health insurance) | 0.35 | 0.06 |        | 0.25 | 0.51  | 0.21 | 0.07 |        | 0.11 | 0.41 | 0.25 | 0.04 |        | 0.18 | 0.35 |
|                                 | Variance (intercept)                                    | 0.37 | 0.04 |        | 0.31 | 0.45  | 0.39 | 0.06 |        | 0.29 | 0.53 | 0.38 | 0.03 |        | 0.32 | 0.45 |
| ICC                             |                                                         |      |      |        |      |       |      |      |        |      |      |      |      |        |      |      |
|                                 | Empty model                                             | 0.10 | 0.01 |        | 0.09 | 0.12  | 0.10 | 0.01 |        | 0.08 | 0.13 | 0.10 | 0.01 |        | 0.09 | 0.12 |
|                                 | Full model                                              | 0.10 | 0.01 |        | 0.09 | 0.12  | 0.11 | 0.01 |        | 0.08 | 0.14 | 0.10 | 0.01 |        | 0.09 | 0.12 |
| Wald Chi Square test            |                                                         |      |      |        |      |       |      |      |        |      |      |      |      |        |      |      |
|                                 | Chi-Square                                              |      |      | 206.87 |      |       |      |      | 97.23  |      |      |      |      | 225.23 |      |      |
|                                 | p value                                                 |      |      | <0.001 |      |       |      |      | <0.001 |      |      |      |      | <0.001 |      |      |

\* Average marginal effects (AME) of location of social health insurance funds at BMIUE: 12.8% (5.6%, 20.0%) for rural-to-urban respondents; 3.1% (-2.3%, 8.6%) for urban-to-urban respondents; 5.8% (1.4%, 10.1%) for all respondents.
